# Supplementary material for: A cold plasma-activated in situ AgCo surface alloy for enhancing the electroreduction of CO2 to ethanol
Source: Royal Society of Chemistry journal article supplement (doi:10.1039/d0ta01262a), 2020-01-01
Supplement: d0ta01262a1.pdf [file d0ta01262a1.pdf]

1 *Supporting Information for*

2

3 **Cold plasma-activated AgCo surface in situ alloying for**  
4 **enhancing CO<sub>2</sub> electroreduction to ethanol**

5

6 Qiang Zhang,<sup>‡ab</sup> Shuihui Tao,<sup>‡cd</sup> Jun Du,<sup>\*ab</sup> Anbang He,<sup>ab</sup> Yong Yang<sup>ab</sup> and Changyuan  
7 Tao<sup>\*ab</sup>

8

9 *<sup>a</sup>State Key Laboratory of Coal Mine Disaster Dynamics and Control, Chongqing University,*  
10 *Chongqing 400044, China.*

11 *<sup>b</sup>College of Chemistry and Chemical Engineering, Chongqing University, Chongqing 401331,*  
12 *China.*

13 *<sup>c</sup>Department of Chemistry, Xi'an Jiaotong-Liverpool University, Suzhou, Jiangsu, 215123,*  
14 *China.*

15 *<sup>d</sup>Department of Chemistry, University of Liverpool, Liverpool, L697ZD, UK.*

16

17

18 <sup>‡</sup>These authors contributed equally.

19 <sup>\*</sup>Corresponding authors: College of Chemistry and Chemical Engineering, Chongqing  
20 University, Chongqing 401331, China.

21 E-mail addresses: dujune@cqu.edu.cn (Jun Du), taocy@cqu.edu.cn (Changyuan Tao).

22

23

24 **Mailing address for correspondence:**

25 Dr. Du, Jun (Prof.)

26 College of Chemistry and Chemical Engineering, Chongqing University

27 No.55 Daxuecheng South Rd., Shapingba

28 Chongqing 401331, China

29 Tel: +86-23-62678923

30 Fax: +86-23-62678923

31 E-mail: dujune@cqu.edu.cn

32

33

1

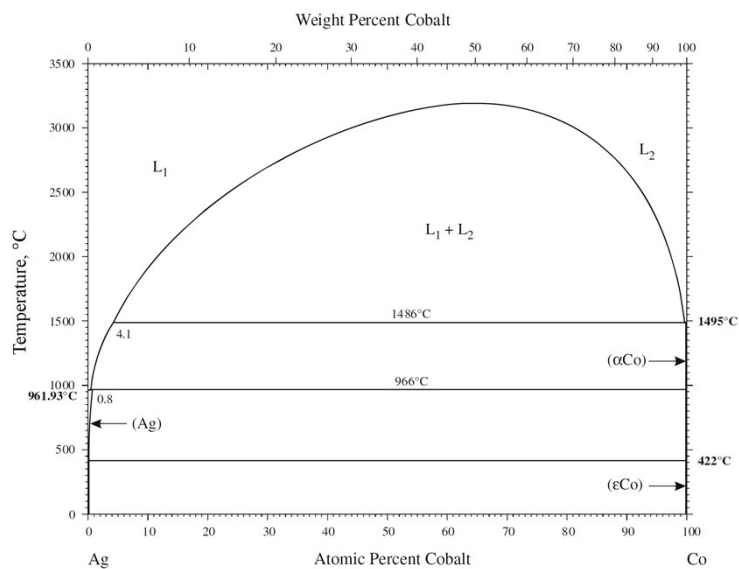

2

3 **Fig. S1** Ag-Co phase diagram.<sup>[1]</sup>

4

5 When the content of cobalt atoms is 0.8%, the Ag-Co partial miscible alloying  
6 requires a very high temperature (961.93°C).<sup>[1]</sup> The high temperature leads to  
7 agglomerate the metal catalyst, which is not conducive to the catalytic reaction. In order  
8 to solve this problem, we used a cold plasma (200 W 10 min) technology under room  
9 temperature to obtain AgCo surface alloy.

10

11

1

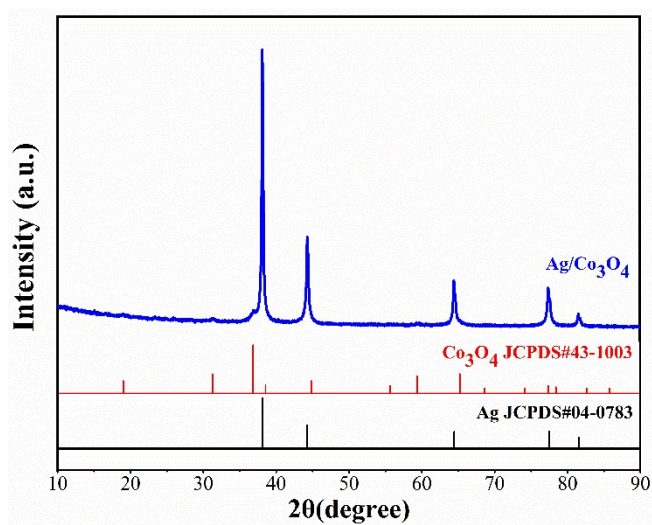

2

3 **Fig. S2** XRD pattern of as-synthesized Ag/Co<sub>3</sub>O<sub>4</sub> nanocubes.

4

5 The diffraction peaks of the Ag/Co<sub>3</sub>O<sub>4</sub> nanocubes at 38.1°, 44.2°, 64.4°, 77.4° and

6 81.5° can be readily assigned to the (111), (200), (220), (311) and (222) crystal planes

7 of Ag (JCPDS#04-0783, space group: *Fm-3m*(225)). The peak at 31.2°, 36.8° and 59.3°

8 is also corresponding to the crystal planes of (220), (311) and (511) of Co<sub>3</sub>O<sub>4</sub>

9 (JCPDS#15-0806, space group: *Fm-3m*(225)).

10

11

12

1

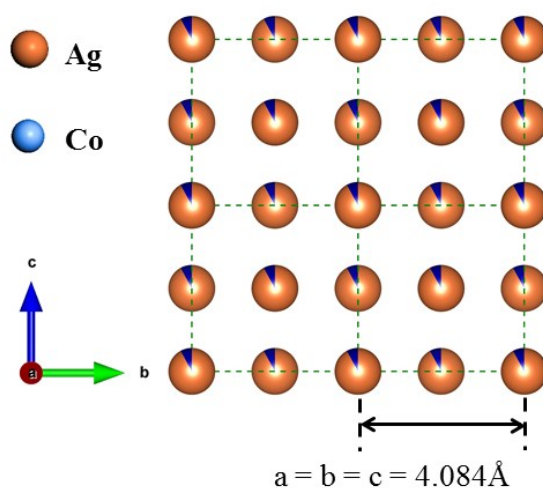

2

3 **Fig. S3** General view of the face-centered-cubic crystal structure with parameters of a  
4  $= b = c = 10.08 \text{ \AA}$ . Zeolitic water is omitted for clarity.

5

6 According to Rietveld calculations, the lattice parameter of AgCo SA ( $a=b=c=$   
7  $4.084 \text{ \AA}$ ) is slightly smaller than pure Ag ( $a=b=c= 4.086 \text{ \AA}$ ), which can indicate that Co  
8 atom has been doped into the Ag lattice. The refined atomic coordinates and thermal  
9 parameters of AgCo SA are listed in Table S1. The occupancy of Ag is 0.92, and the  
10 occupancy of Co is only 0.08.

11

12

1

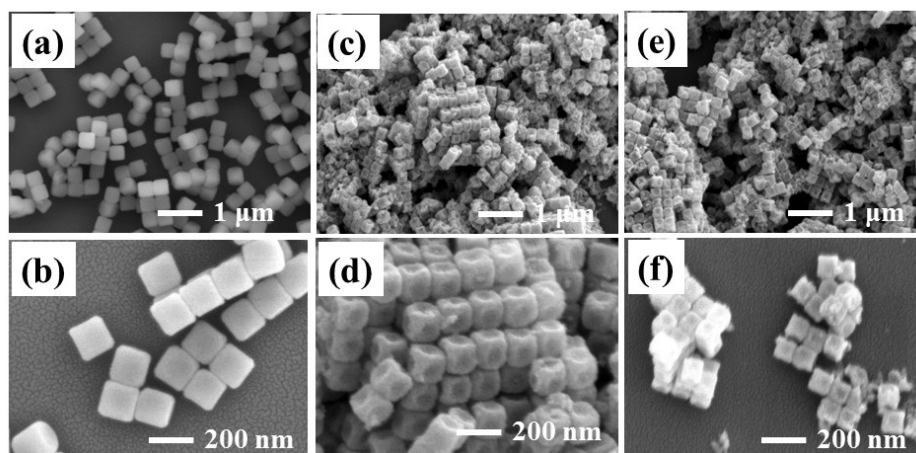

2

3 **Fig. S4** FESEM images of the precursor  $\text{Ag}_3\text{Co}(\text{CN})_6$  (a-b),  $\text{Ag}/\text{Co}_3\text{O}_4$  (c-d) and  $\text{AgCo}$

4 SA (e-f) at different magnification.

5 The FESEM images revealed that  $\text{Ag}_3\text{Co}(\text{CN})_6$  boxes were uniform in size with

6 diameters  $\approx 100\text{-}200$  nm with smooth surface. After pyrolysis,  $\text{Ag}/\text{Co}_3\text{O}_4$

7 submicroboxes were formed, which maintained the precursor's morphology with cube

8 faces becoming concave, as a result of decomposition and volatilization of organic

9 compounds. Moreover, after cold  $\text{H}_2$ -plasma treatment, resulting  $\text{AgCo}$  SA retained the

10 submicroboxes shape with concave and the surfaces became very rough as shown in

11 Fig. S4e-f.

12

13

1

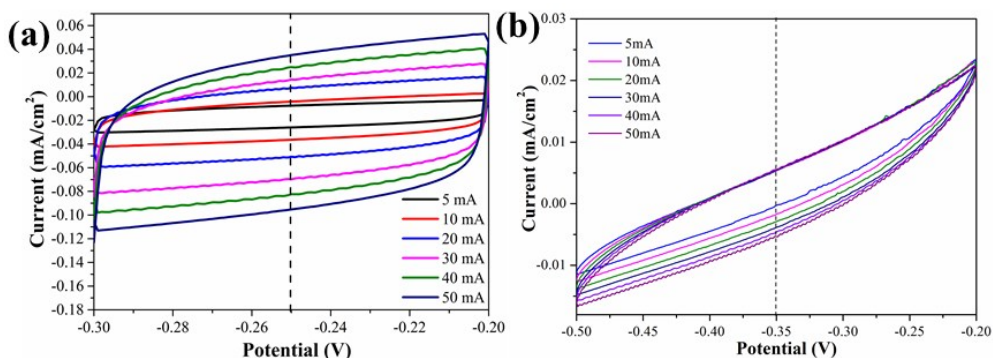

2

3 **Fig. S5** CV curve of (a) AgCo SA and (b) pure Co electrode in 0.1 M KHCO<sub>3</sub> saturated  
4 with CO<sub>2</sub> over under different scan rate.

5 The high activity of AgCo SA is partly ascribed to the high electrochemical active  
6 area (ECSA), which represents the amount of active sites to a certain degree, normally,  
7 the ECSA can be approximated to the electrochemical double layer capacitance  
8 (EDLC). Not surprisingly, AgCo SA exhibits a higher EDLC than pure Co, indicating  
9 larger ECSA, followed by a great number of active sites on AgCo SA, which is an  
10 important contributor to the enhanced activity.

11

1

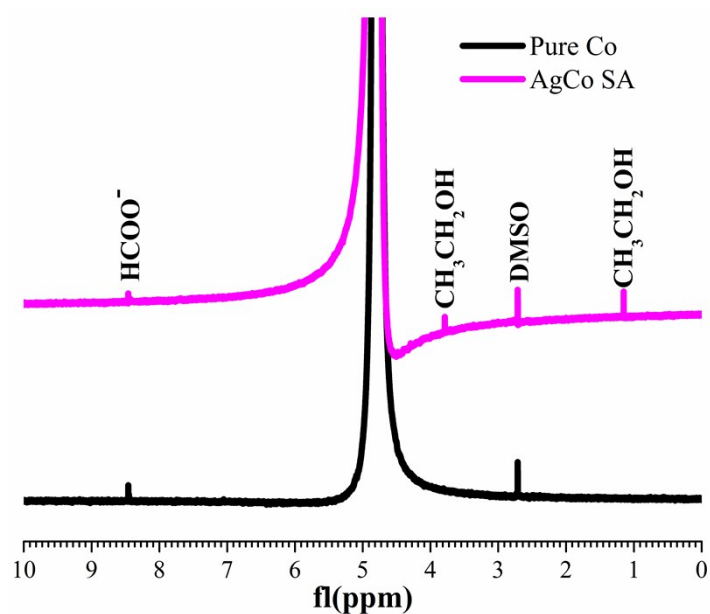

2

3 **Fig. S6** <sup>1</sup>H-NMR of the aqueous products after the CO<sub>2</sub>RR for 5 h at -0.8 V vs. RHE  
4 over AgCo SA and pure Co electrodes. The <sup>1</sup>H spectrum was tested with water  
5 suppression by a pre-saturation method. Typically, 0.1 mL of KHCO<sub>3</sub> solution after  
6 electrolysis was mixed with 0.1 mL of D<sub>2</sub>O, which contained 0.05 μL of DMSO as an  
7 internal standard. The concentrations of formic acid and ethanol, were measured using  
8 an internal standard, DMSO (star, 2.5 ppm), to be 0.7 and 2.1 ppm, which were  
9 converted to the FEs of each product of 8.4% and 22.2%, respectively, in case of AgCo  
10 SA. The concentrations of formic acid were measured using an internal standard,  
11 DMSO (star, 2.5 ppm) to be 1.40 ppm, which were converted to the FEs of each product  
12 of 0.03%, respectively, in case of pure Co. Both data was analyzed by considering the  
13 total volume of the electrolyte (30 mL) and the total current, 7.4 mA•cm<sup>-2</sup> (AgCo SA)  
14 and 4.9 mA•cm<sup>-2</sup> (pure Co).

15

16

1

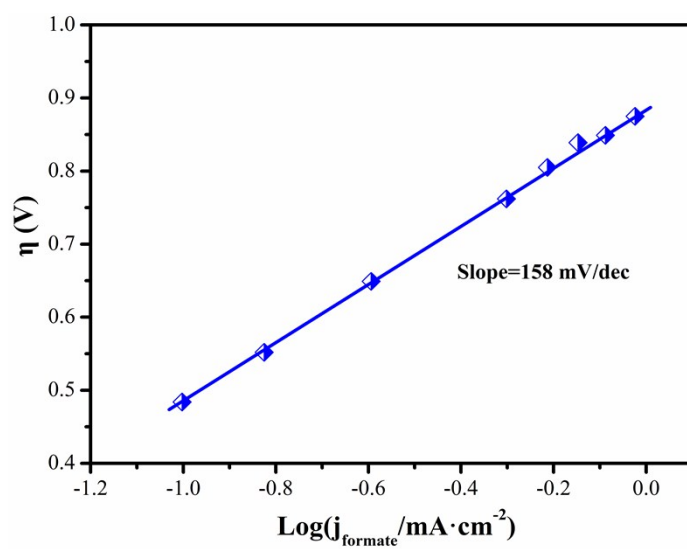

2

3 Fig. S7 Tafel plot for formate on pure Co electrodes in 0.1 M  $\text{KHCO}_3$  solution.

4

5



1

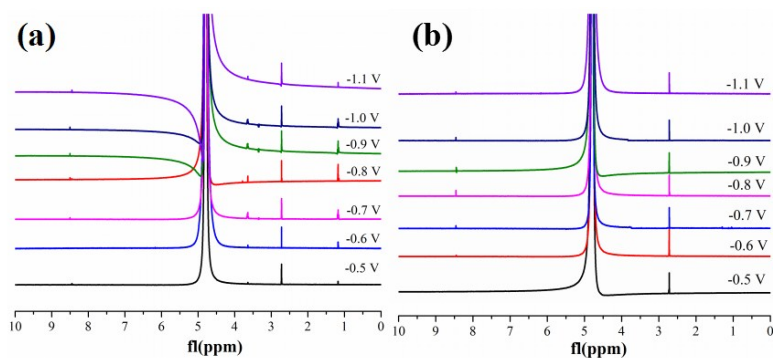

2

3 **Fig. S8**  $^1\text{H-NMR}$  of the aqueous products after the  $\text{CO}_2\text{RR}$  for 5 h at different potentials

4 over AgCo SA (a) and pure Co (b).

5

6

7

1

2

**Table S1** Structural parameters for AgCo SA in cubic system

| Atom | x | y | z | g       | Ueq(Å <sup>2</sup> ) |
|------|---|---|---|---------|----------------------|
| Ag1  | 0 | 0 | 0 | 0.92(3) | 0.00009              |
| Co1  | 0 | 0 | 0 | 0.08(3) | 0.00158              |

3

4 **Table S2** Electrochemical CO<sub>2</sub>RR properties of AgCo SA compared with other  
5 electrocatalysts for ethanol production.

| Catalysts                  |                                                          | Electrolyte                   | Work potential        | Current density (mA/cm <sup>2</sup> ) | Ethanol faradaic efficiency | Stability    | Ref.             |
|----------------------------|----------------------------------------------------------|-------------------------------|-----------------------|---------------------------------------|-----------------------------|--------------|------------------|
| Bimetallic Alloy catalysts | CuAg alloy                                               | 1 M KOH                       | -0.7 V vs. RHE        | 300                                   | 25%                         | N.R.         | 2                |
|                            | Cu <sub>x</sub> Zn alloy                                 | 0.1 M KHCO <sub>3</sub>       | -1.05 V vs. RHE       | 8.2                                   | ~29.1%                      | 5 h          | 3                |
|                            | Au <sub>36</sub> Cu <sub>64</sub>                        | 0.5 M KHCO <sub>3</sub>       | -0.9 V vs. SCE        | N.R.                                  | ~12%                        | N.R.         | 4                |
|                            | <b>AgCo SA</b>                                           | <b>0.1 M KHCO<sub>3</sub></b> | <b>-0.8 V vs. RHE</b> | <b>7.4</b>                            | <b>72.3%</b>                | <b>~48 h</b> | <b>This work</b> |
| Other catalysts            | Ag-G-NCF                                                 | 0.1 M KHCO <sub>3</sub>       | -0.6 V vs. RHE        | 0.31                                  | 82.1%                       | 10 h         | 5                |
|                            | N-doped mesoporous carbon                                | 0.1 M KHCO <sub>3</sub>       | -0.56 V vs. RHE       | ~0.25                                 | 77%                         | 24 h         | 6                |
|                            |                                                          | 1 M KHCO <sub>3</sub>         | -0.67 V vs. RHE       | 250                                   | ~41%                        | N.R.         | 7                |
|                            | Plasma-activated Cu nanocube                             | 0.1 M KHCO <sub>3</sub>       | -1.0 V vs. RHE        | ~34                                   | ~22%                        | N.R.         | 8                |
|                            |                                                          | 0.1 M KHCO <sub>3</sub>       | -0.85 V vs. RHE       | 10                                    | ~17%                        | 10 h         | 9                |
|                            | Cu <sub>2</sub> O                                        | 0.1 M KHCO <sub>3</sub>       | -0.99 V vs. RHE       | 35                                    | ~16%                        | 60 h         | 10               |
|                            |                                                          | 1 M KOH                       | -0.78 V vs. RHE       | ~23                                   | ~16%                        | N.R.         | 11               |
|                            | Cu(B)-2                                                  | 0.1 M KHCO <sub>3</sub>       | -1.1 V vs. RHE        | ~70                                   | ~27%                        | ~36 h        | 12               |
|                            |                                                          | 1 M KOH                       | -0.92 V vs. RHE       | 120                                   | ~24.7%                      | ~16 h        | 13               |
|                            | Ag-Co <sub>3</sub> O <sub>4</sub> -CeO <sub>2</sub> /LGC | 0.1 M KHCO <sub>3</sub>       | -0.85 V vs. RHE       | 12.8                                  | 54.2%                       | 60 h         | 14               |
|                            |                                                          | 0.2 M KI                      | -0.75 V vs. RHE       | 0.65                                  | 43.6%                       | 20 h         | 15               |
|                            | CuO/TiO <sub>2</sub>                                     | 0.5 M KHCO <sub>3</sub>       | -0.85 V vs. RHE       | 8.03                                  | 27.4%                       | 25 h         | 16               |

6 N.R. : not reported

7

8

## References

- [1] H. Okamoto, *J. Phase Equilib. Diff.*, 2015, 36, 10-21.
- [2] T. T. H. Hoang, S. Verma, S. Ma, T. T. Fister, A. I. Frenkel, P. J. A. Kenis and A. A. Gewirth, *J. Am. Chem. Soc.*, 2018, 140, 5791-5797.
- [3] D. Ren, B. S. H. Ang and B. S. Yeo, *ACS Catal.*, 2016, 6, 8239-8247.
- [4] F. L. Jia, X. X. Yu, L. Z. Zhang, *J. Power Sources*, 2014, 252, 85-89.
- [5] K. L. Lv, Y. C. Fan, Y. Zhu, Y. Yuan, J. R. Wang, Y. Zhu and Q. F. Zhang, *J. Mater. Chem. A*, 2018, 6, 5025-5031.
- [6] Y. F. Song, W. Chen, C. C. Zhao, S. G. Li, W. Wei and Y. H. Sun, *Angew. Chem. Int. Ed.*, 2017, 56, 10840-10844.
- [7] Y. C. Li, Z. Y. Wang, T. G. Yuan, D. H. Nam, M. C. Luo, J. Wicks, B. Chen, J. Li, F. W. Li, F. P. García de Arquer, Y. Wang, C. T. Dinh, O. Voznyy, D. Sinton and E. H. Sargent, *J. Am. Chem. Soc.*, 2019, 141, 8584-8591.
- [8] D. F. Gao, I. Zegkinoglou, N. J. Divins, F. Scholten, I. Sinev, P. Grosse and B. R. Cuenya, *ACS Nano*, 2017, 11, 4825-4831.
- [9] D. Kim, C. S. Kley, Y. F. Li and P. D. Yang, *P. Natl. Acad. Sci. U. S. A.*, 2017, 114, 10560-10565.
- [10] D. Ren, Y. L. Deng, A. D. Handoko, C. S. Chen, S. Malkhandi and B. S. Yeo, *ACS Catal.*, 2015, 5, 2814-2821.
- [11] J. J. Wu, S. C. Ma, J. Sun, J. I. Gold, C. S. Tiwary, B. Kim, L. Y. Zhu, N. Chopra, I. N. Odeh, R. Vajtai, A. Z. Yu, R. Luo, J. Lou, G. Q. Ding, P. J. A. Kenis and P. M. Ajayan, *Nat. Commun.*, 2016, 7, 13869.
- [12] Y. S. Zhou, F. L. Che, M. Liu, C. Q. Zou, Z. Q. Liang, P. De Luna, H. F. Yuan, J. Li, Z. Q. Wang, H. P. Xie, H. M. Li, P. N. Chen, E. Bladt, R. Quintero-Bermudez, T. K. Sham, S. Bals, J. Hofkens, D. Sinton, G. Chen and E. H. Sargent, *Nat. Chem.*, 2018, 10, 974-980.
- [13] T. T. Zhuang, Z. Q. Liang, A. Seifitokaldani, Y. Li, P. De Luna, T. Burdyny, F. L. Che, F. Meng, Y. M. Min, R. Quintero-Bermudez, D. Cao Thang, Y. J. Pang, M. Zhong, B. Zhang, J. Li, P. N. Chen, H. Y. Liang, W. N. Ge, B. J. Ye, D. Sinton, S. H. Yu and E. H. Sargent, *Nat. Catal.*, 2018, 1, 421-428.
- [14] Q. Zhang, J. Du, A. B. He, Z. H. Liu and C. Y. Tao, *J. CO2 Util.*, 2019, 34, 635-645.
- [15] J. Yuan, M. P. Yang, Q. L. Hu, S. M. Li, H. Wang and J. X. Lu, *J. CO2 Util.*, 2018, 24, 334-340.
- [16] J. Yuan, J. J. Zhang, M. P. Yang, W. J. Meng, H. Wang and J. X. Lu, *Catal.*, 2018, 8, 171-181.
